# Supplementary material for: Catalytic and SERS activities of WO3-based nanowires: the effect of oxygen vacancies, silver nanoparticle doping, and the type of organic dye
Source: Royal Society of Chemistry journal article supplement (doi:10.1039/d2cp00034b), 2022-01-01
Supplement: d2cp00034b1.pdf [file d2cp00034b1.pdf]

## Catalytic and SERS activities of WO<sub>3</sub>-based nanowires: The effect of oxygen vacancy, silver nanoparticle doping, and the type of organic dyes

Oguzhan Ustun<sup>a</sup>, Asli Yilmaz<sup>b</sup>, Mehmet Yilmaz<sup>a,c\*</sup>

<sup>a</sup>Department of Nanoscience and Nanoengineering, Ataturk University, 25240 Erzurum, Turkey

<sup>b</sup>Department of Molecular Biology and Genetics, Ataturk University, 25240 Erzurum, Turkey

<sup>c</sup>Department of Chemical Engineering, Ataturk University, 25240 Erzurum, Turkey

\*Correspondence: MY, [nano.yilmaz@gmail.com](mailto:nano.yilmaz@gmail.com)

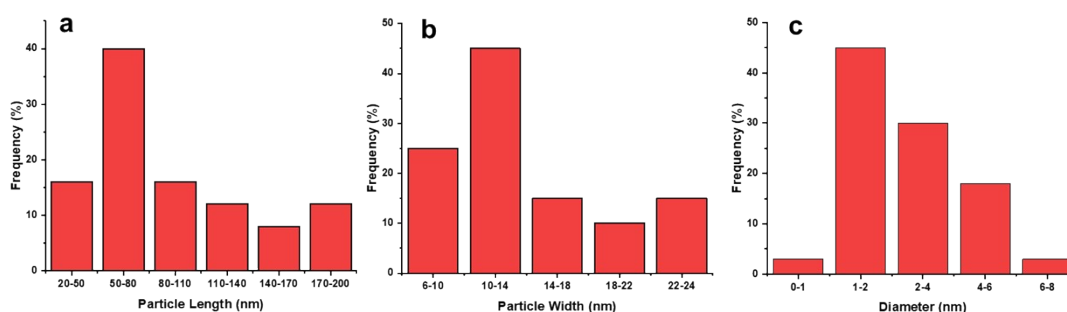

**Figure S1.** The particle length (a) and width (b) distribution for WO<sub>3-x</sub> NPs and diameter of Ag nanostructures (c) for WO<sub>3-x</sub>@Ag NPs.

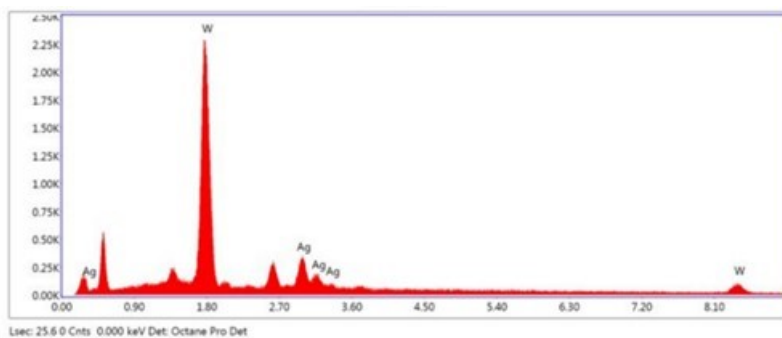

Lsec: 25.60 Cnts 0.000 keV Det: Octane Pro Det

**eZAF Smart Quant Results**

| Element | Weight % | Atomic % | Net Int. | Error % | Kratio | Z    | R    | A    | F    |
|---------|----------|----------|----------|---------|--------|------|------|------|------|
| WM      | 81.20    | 71.70    | 1,568.14 | 2.71    | 0.79   | 0.97 | 1.02 | 0.99 | 1.02 |
| AgL     | 18.80    | 28.30    | 251.95   | 8.91    | 0.15   | 1.12 | 0.93 | 0.72 | 1    |

**Figure S2.** EDX spectra of  $\text{WO}_{3-x}@Ag$  NPs.

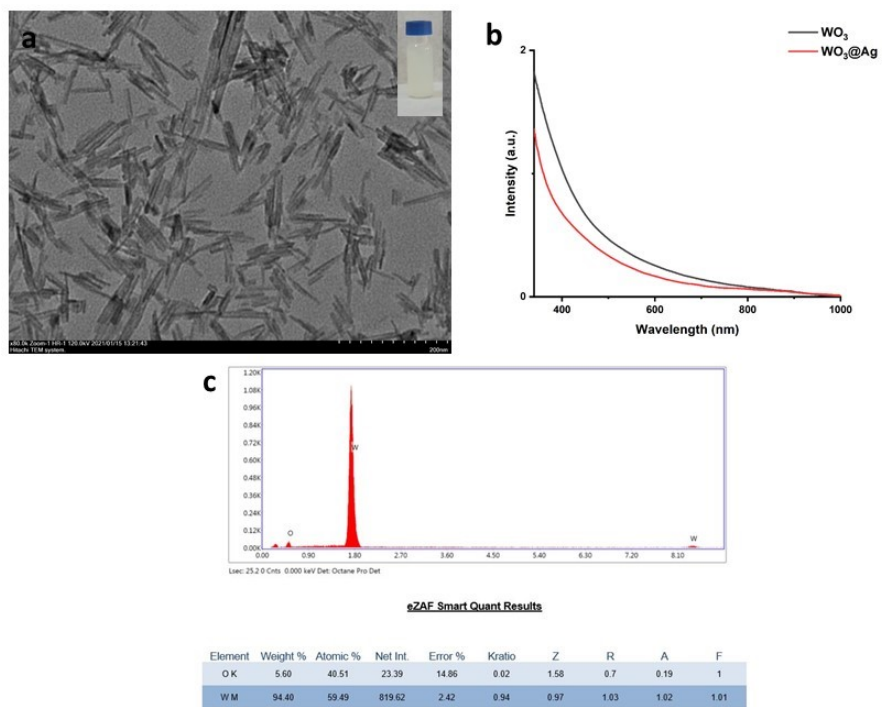

**Figure S3.** TEM (a), UV-vis absorption (b), and EDX spectra (c) of  $\text{WO}_3$  NWs after the addition of Ag ions.

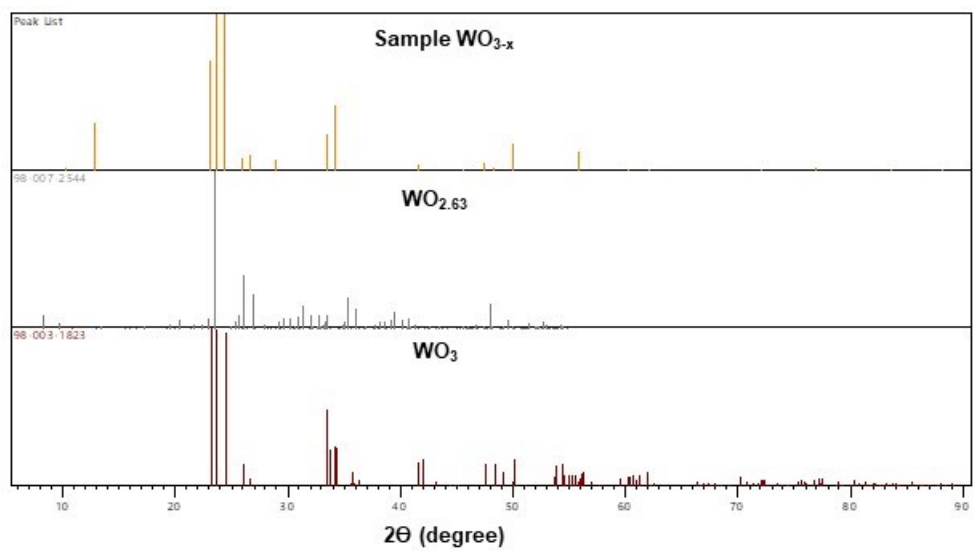

**Figure S4.** The Rietveld refinement analysis for  $\text{WO}_{3-x}$  nanosystem.

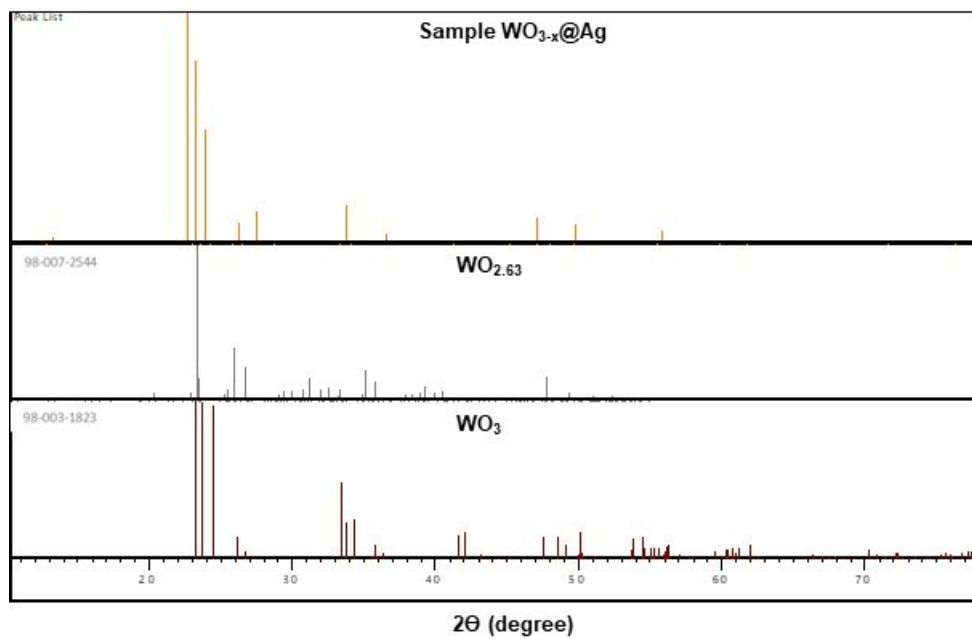

**Figure S5.** The Rietveld refinement analysis for  $\text{WO}_{3-x}@Ag$  nanosystem.

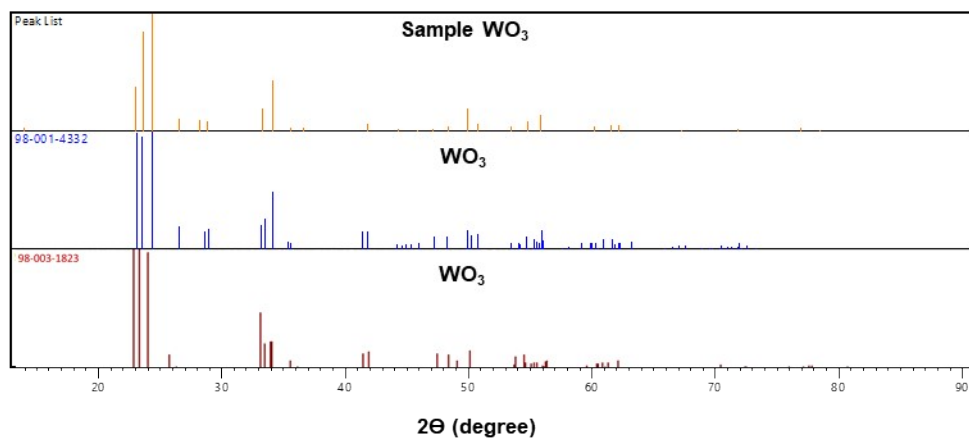

**Figure S6.** The Rietveld refinement analysis for  $\text{WO}_3$  nanosystem.

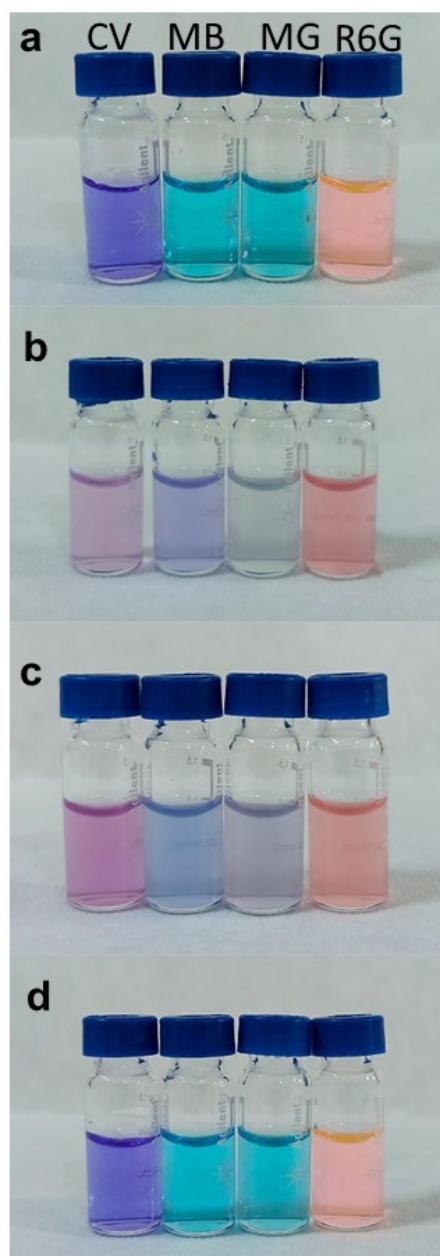

**Figure S7.** The optic images of pure aqueous dye solutions (a), mixed with  $WO_{3-x}$  (b),  $WO_{3-x}@Ag$  (c), and  $WO_3$  (d) NP systems. The images were collected immediately after mixing of dyes and NP systems. The final concentration of the dye is  $10^{-5}$  M.

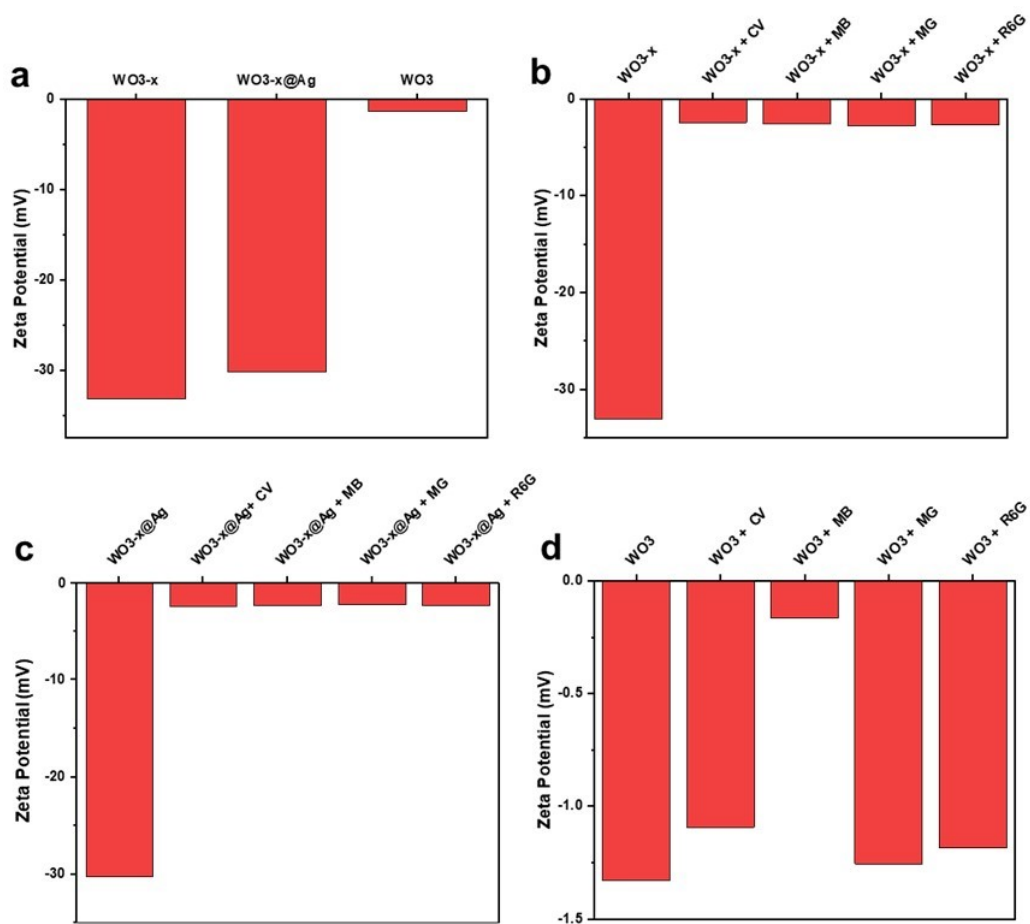

**Figure S8.** The zeta potentials of pristine aqueous suspensions of NP systems (a) and their mixture with various dyes for WO<sub>3-x</sub> (b), WO<sub>3-x</sub>@Ag (c), and WO<sub>3</sub> (d). The final concentration of the dye is 10<sup>-5</sup> M.



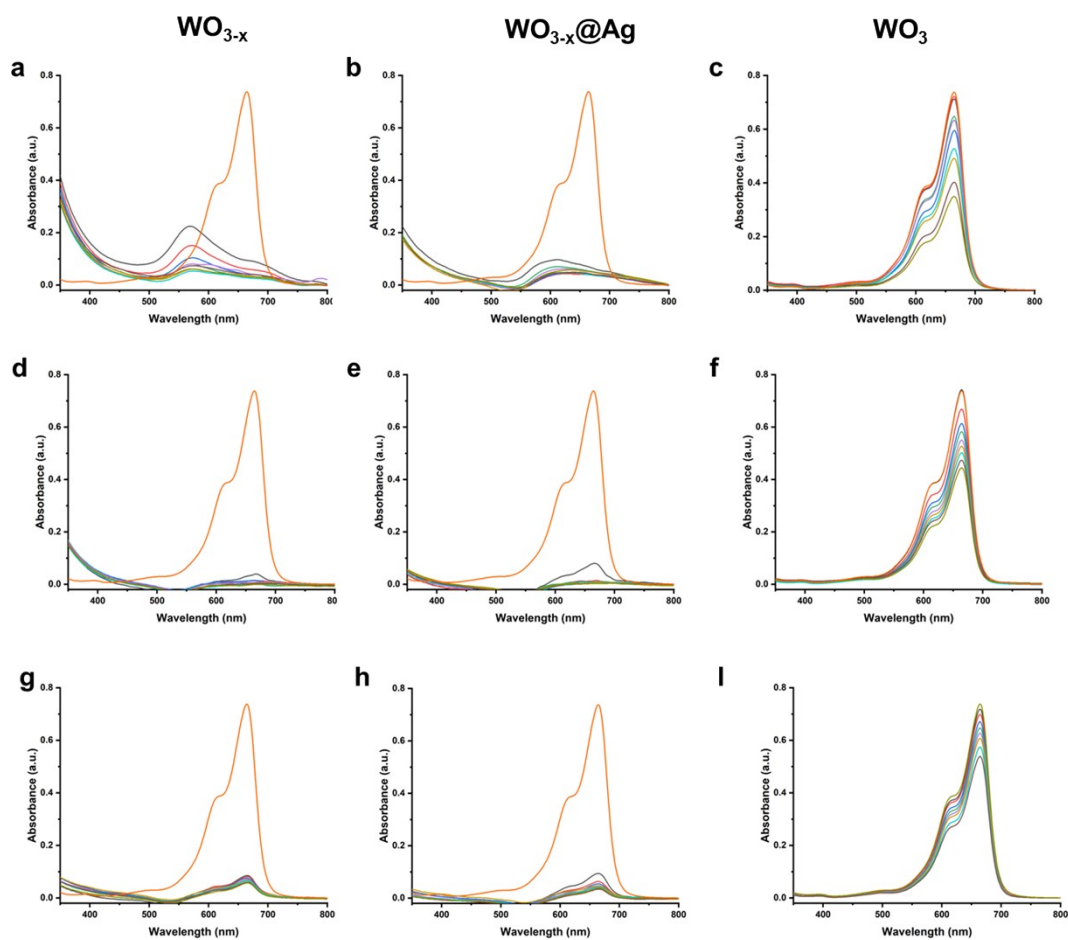

**Figure S9.** Reusability test of the MB in the presence of different nanosystems. The photocatalytic test was evaluated 3 times for each nanosystem. First cycle (a, b, and c), second cycle (d, e, and f), and third cycle (g, h, and i).

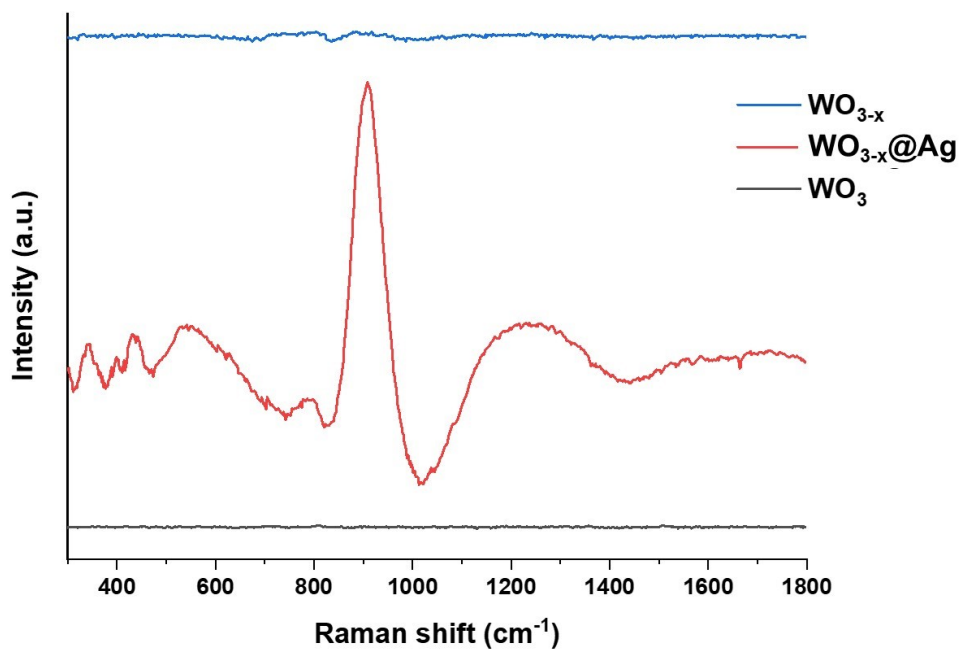

**Figure S10.** The representative Raman spectra for WO<sub>3-x</sub>, WO<sub>3-x</sub>@Ag, and WO<sub>3</sub> NP systems.

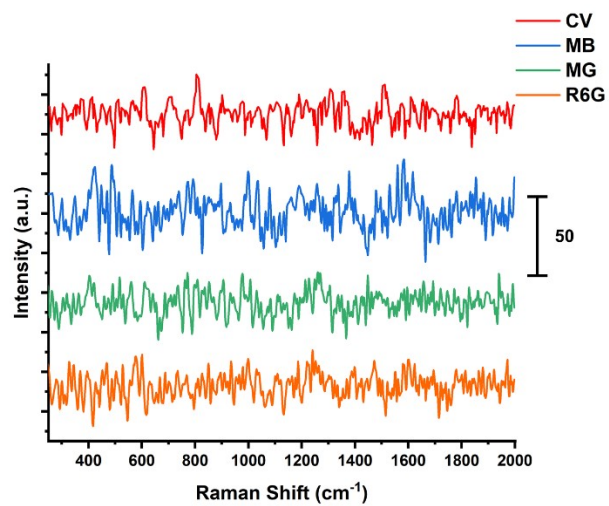

**Figure S11.** Raman spectra of pure CV, MB, MG, and R6G at  $10^{-5}$  M concentration on aluminum foil without  $\text{WO}_3$ -based material.

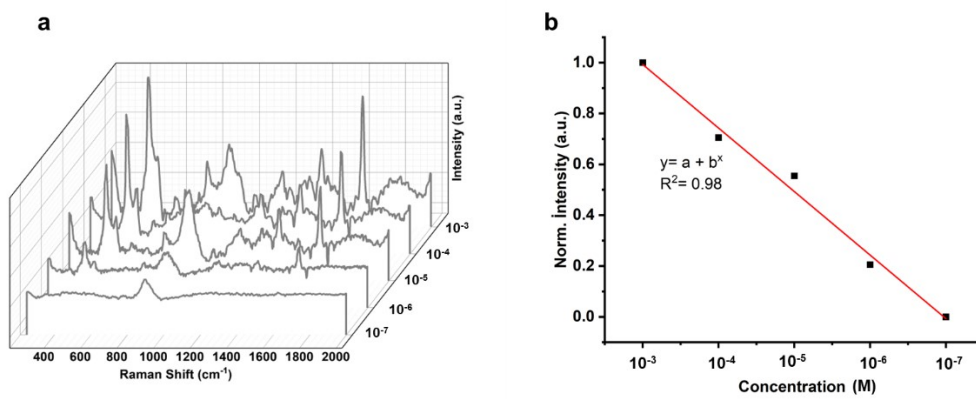

**Figure S12.** Representative Raman spectra of MB at various concentrations in the presence of  $\text{WO}_{3-x}@\text{Ag}$  NP system (a) and normalized peak intensities at  $1619 \text{ cm}^{-1}$  (b).
